# Supplementary material for: Granzyme B mediated function of Parvovirus B19-specific CD4+ T cells
Source: PubMed Central journal article supplement (PMC4524951; doi:10.1038/cti.2015.13), 2015-07-03

# Supplementary Fig. 1

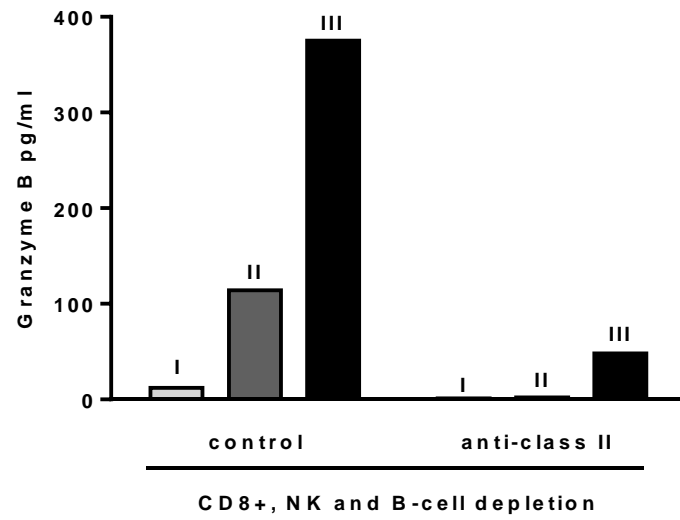

Supplement: cti201513x2.pdf [file cti201513x2.pdf]
