# Supplementary material for: Granzyme B mediated function of Parvovirus B19-specific CD4+ T cells
Source: PubMed Central journal article supplement (PMC4524951; doi:10.1038/cti.2015.13), 2015-07-03

Supplementary Fig. 2

(A)

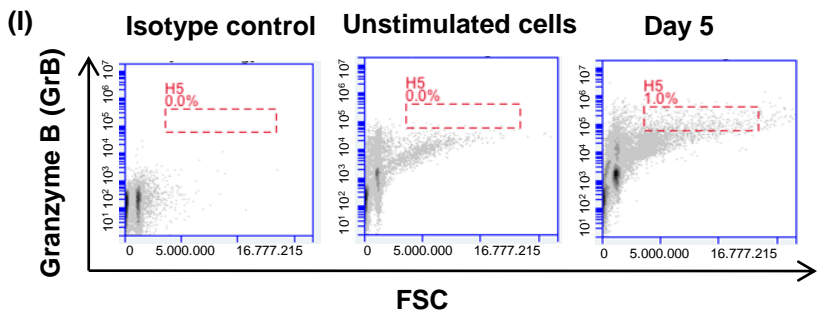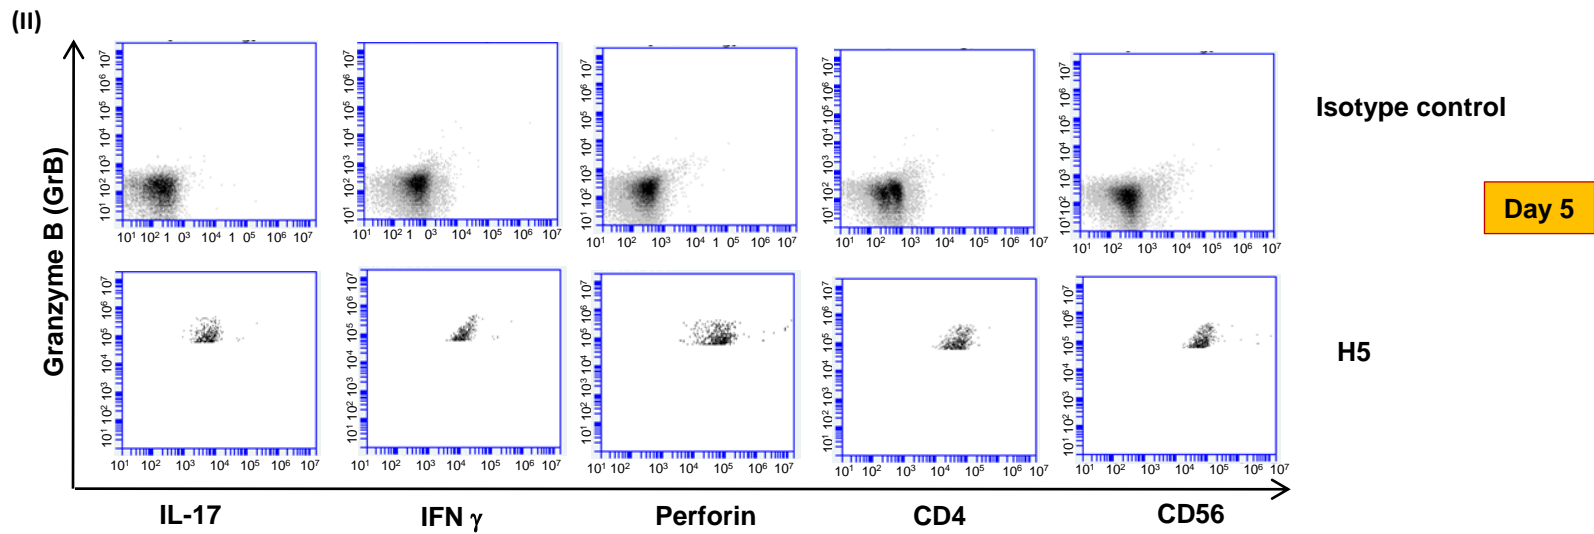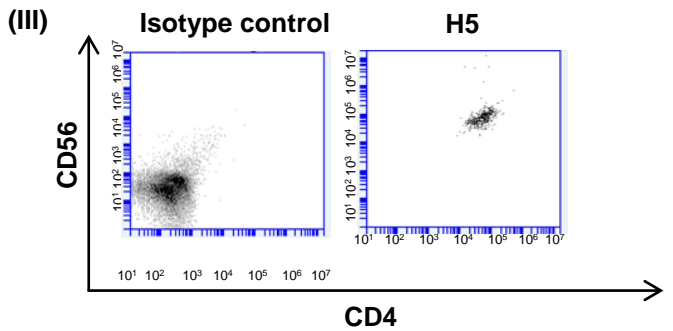

(B)

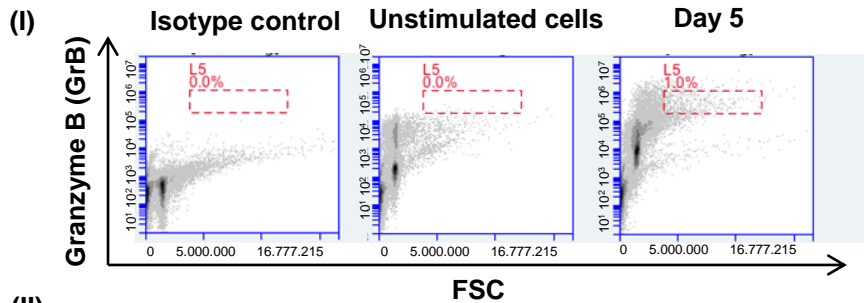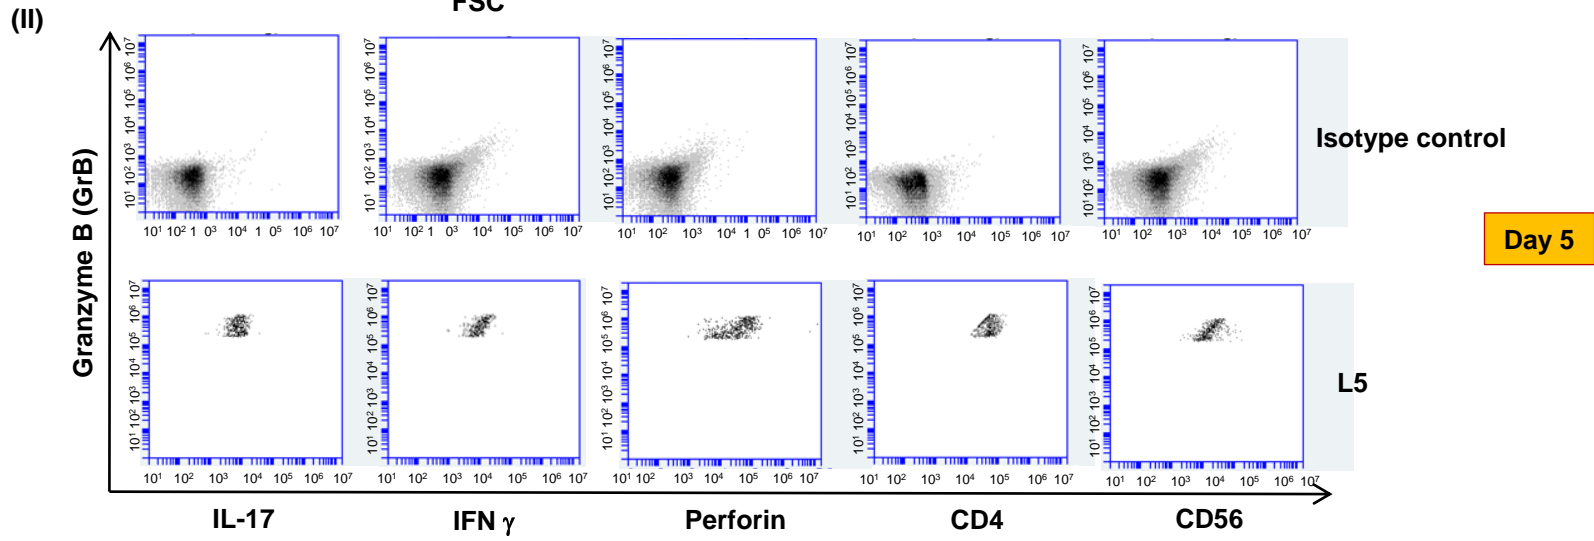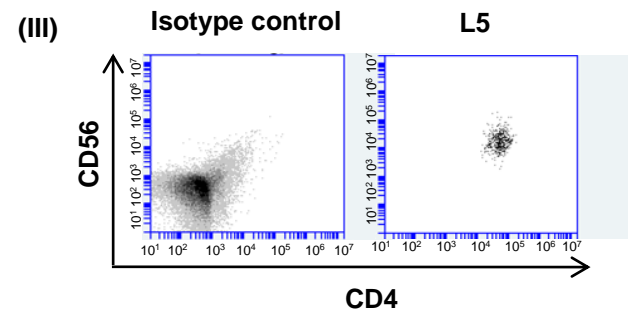

Supplement: cti201513x3.pdf [file cti201513x3.pdf]
